# Supplementary material
Source: publisher figshare collection journal article supplement (https://acs.figshare.com/ndownloader/files/3711061)
Supplement: Supplementary file 1 [file 3711061]

## Supporting Information

### Manganese oxide-coated carbon nanotubes as dual-modality lymph mapping agents for photothermal therapy of tumor metastasis

*Sheng Wang, Qin Zhang, Peng Yang, Xiangrong Yu, Li-Yong Huang, Shun Shen,<sup>\*</sup> and*

*Sanjun Cai<sup>\*</sup>*

Corresponding author's email address: cai\_sanjunsai@163.com (S.J. Cai);

sshenshen@fudan.edu.cn (S. Shen)

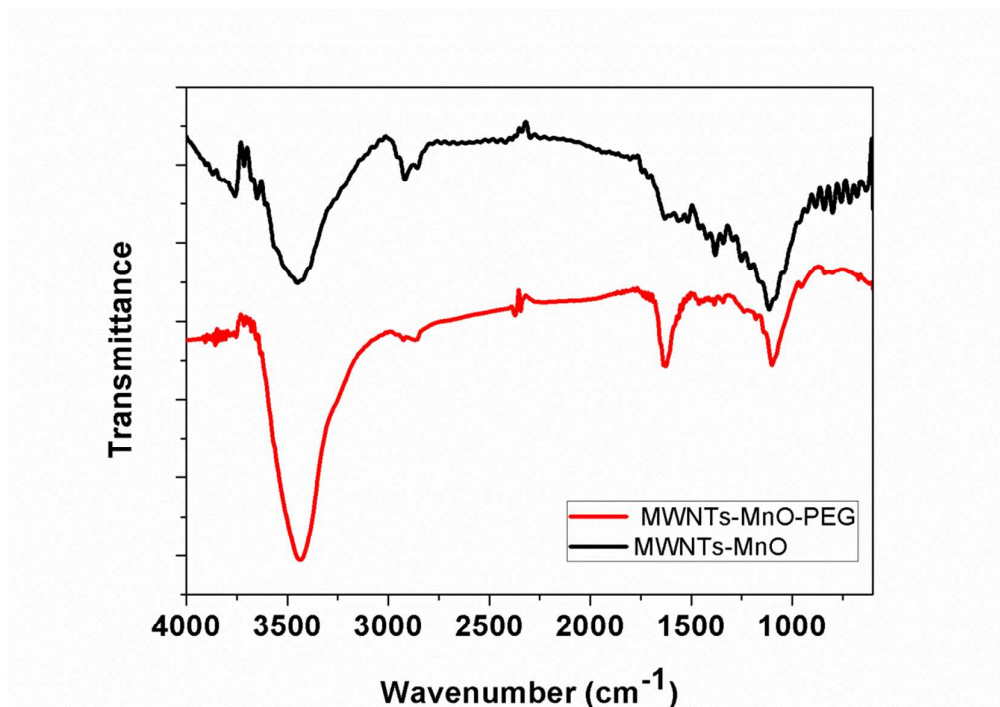

**Fig. S1** The FTIR spectra of MWNTs-MnO-PEG and MWNTs-MnO.

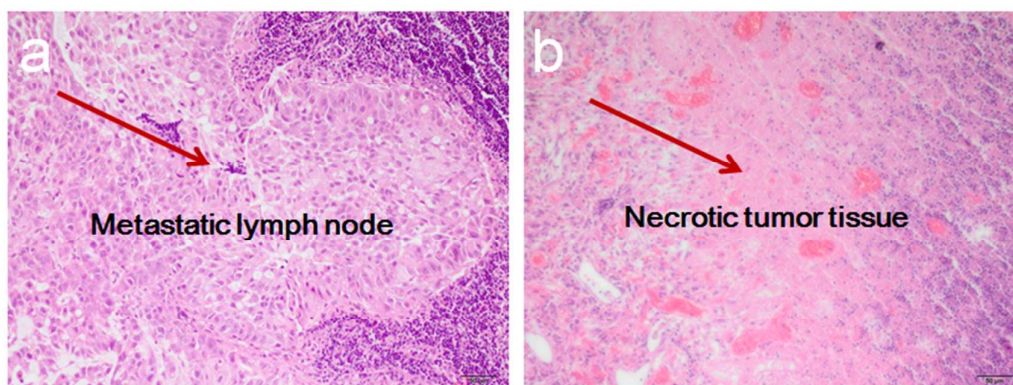

**Fig. S2** Histological analysis of H&E of PTT. (a) A lot of tumor cells were observed in NS group. (b) Coagulative necrosis cells were observed in MWNTs-MnO-PEG under NIR irradiation group.

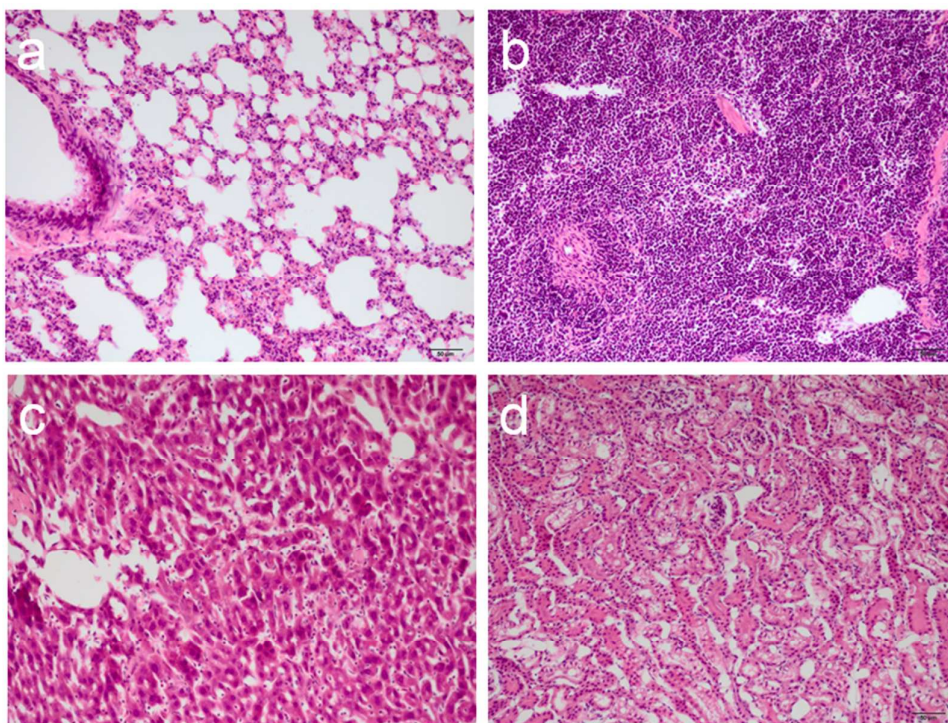

**Fig. S-3** Histological analysis of H&E staining of (a) lung, (b) spleen, (c) liver and (d) kidney. No noticeable abnormality was observed in all examined major organs.
